# Supplementary material for: Layered assembly of alkoxy-substituted bis(trichlorosilanes) containing various organic bridges via hydrolysis of Si–Cl groups
Source: Royal Society of Chemistry journal article supplement (doi:10.1039/b512482d), 2005-01-01
Supplement: b512482d.pdf [file b512482d.pdf]

**Electronic supplementary information (ESI)**

**Layered assembly of alkoxy-substituted bis(trichlorosilanes) containing various organic bridges *via* hydrolysis of Si–Cl groups**

Yasuhiro Fujimoto, Masaru Heishi, Atsushi Shimojima and Kazuyuki Kuroda

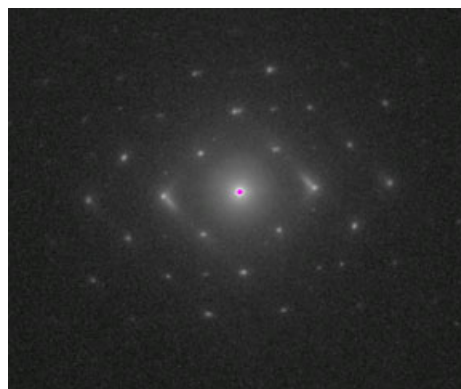

**Fig. S1** ED pattern of **3H**.

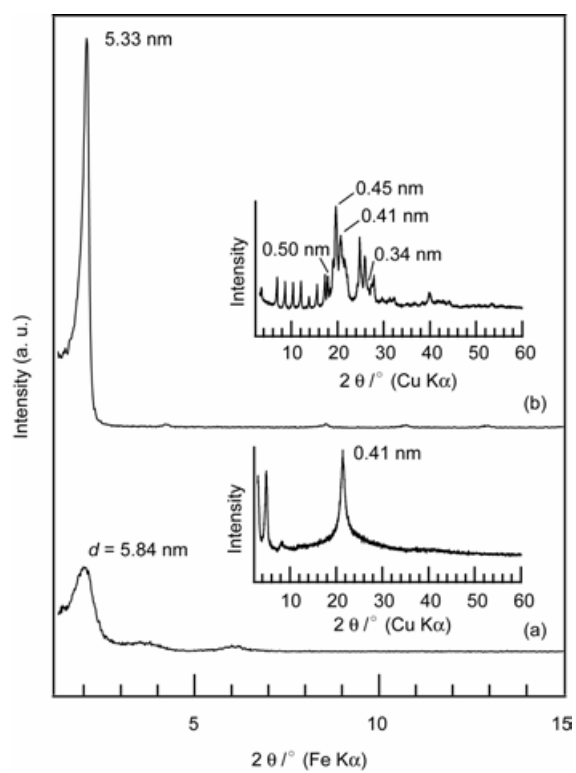

**Fig. S2** XRD patterns of the precipitates obtained by cooling the hydrolyzed solutions of (a) **1** and (b) **3**. The insets show the XRD patterns of higher  $2\theta$  regions.

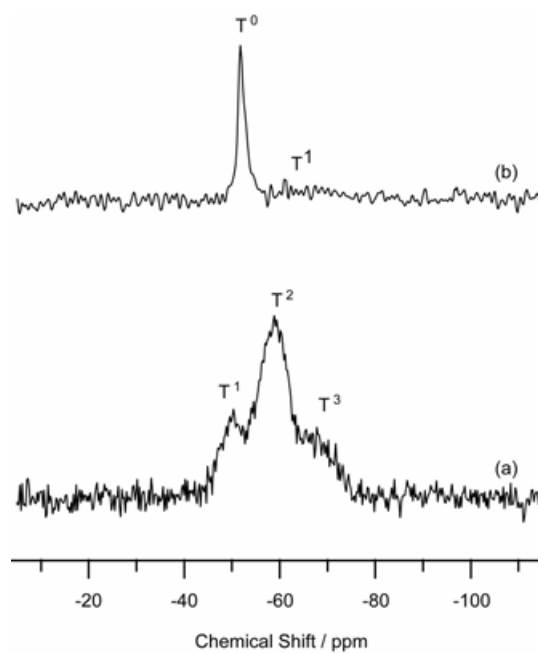

**Fig. S3** Solid-state  $^{29}\text{Si}$  MAS NMR spectra of the precipitates obtained by cooling the hydrolyzed solutions of (a) **1** and (b) **3**.

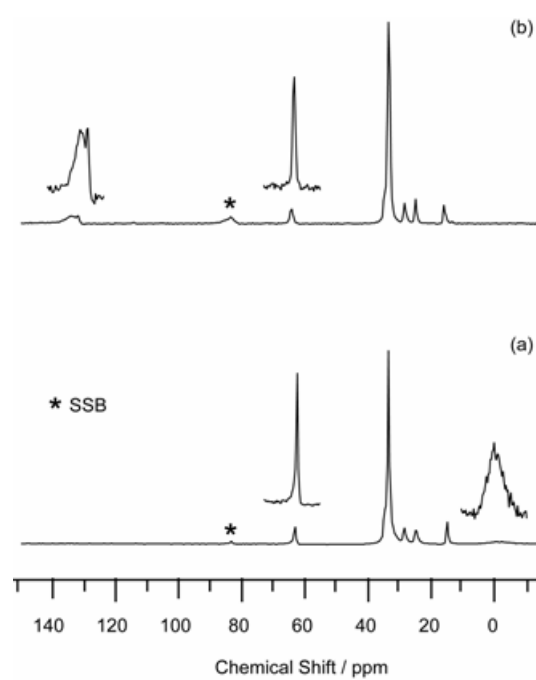

**Fig. S4** Solid-state  $^{13}\text{C}$  CP/MAS NMR spectra of the precipitates obtained by cooling the hydrolyzed solutions of (a) **1** and (b) **3**.

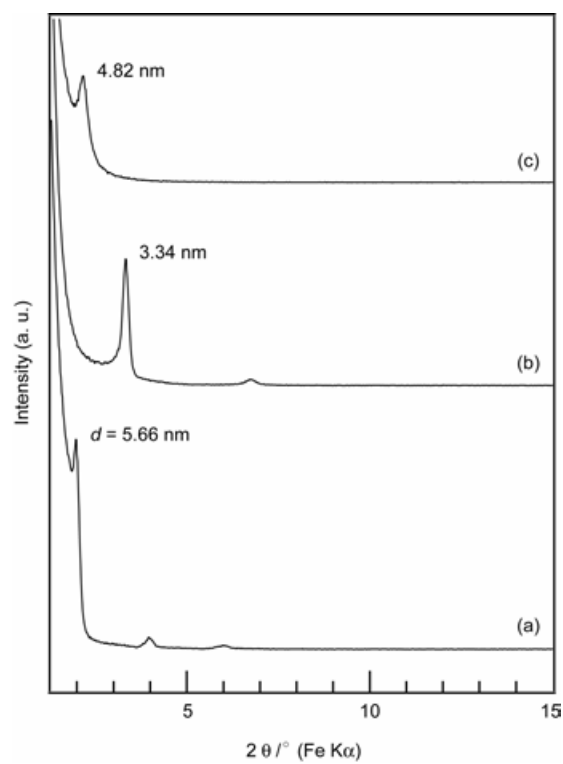

**Fig. S5** XRD patterns of the thin films on glass substrates prepared by spin-coating the hydrolyzed solutions of (a) **1**, (b) **2**, and (c) **3**.
